# Supplementary material for: Hyaluronic acid–amphotericin B nanocomplexes: a promising anti-leishmanial drug delivery system
Source: Royal Society of Chemistry journal article supplement (doi:10.1039/d1bm01769a), 2022-01-01
Supplement: d1bm01769a1.pdf [file d1bm01769a1.pdf]

## Supplementary Material

# Hyaluronic acid-Amphotericin B Nanocomplexes: a Promising Anti-Leishmanial Drug Delivery System

R. Silva-Carvalho <sup>1,2</sup>, T. Leão <sup>3,4</sup>, A. I. Bourbon <sup>5</sup>, C. Gonçalves <sup>5</sup>, L. M. Pastrana <sup>5</sup>, P. Parpot <sup>1,2,6</sup>, I. Amorim <sup>7</sup>, A. M. Tomás <sup>3,4,7</sup>, F. M. Gama <sup>1,2,\*</sup>

<sup>1</sup> CEB - Centre of Biological Engineering, University of Minho, Campus de Gualtar, 4710-057 Braga, Portugal;

<sup>2</sup> LABELS –Associate Laboratory, Braga, Guimarães, Portugal;

<sup>3</sup> i3S - Instituto de Investigação e Inovação em Saúde, Universidade do Porto, Rua Alfredo Allen 208, 4200-135 Porto, Portugal;

<sup>4</sup> IBMC - Instituto de Biologia Molecular e Celular, Universidade do Porto, Rua Alfredo Allen 208, 4200-135 Porto, Portugal;

<sup>5</sup> International Iberian Nanotechnology Laboratory, Av. Mestre José Veiga s/n, 4715-330 Braga, Portugal

<sup>6</sup> Centre of Chemistry, University of Minho, Campus de Gualtar, 4710-057 Braga, Portugal;

<sup>7</sup> ICBAS - Instituto de Ciências Biomédicas Abel Salazar, Universidade do Porto, Rua de Jorge Viterbo Ferreira 228, 4050-313 Porto, Portugal;

### \* Corresponding Author:

Miguel Gama

[fmgama@deb.uminho.pt](mailto:fmgama@deb.uminho.pt)

Department of Biological Engineering

University of Minho

Campus de Gualtar

4710-057 Braga

Portugal

## Supplementary Methods

### Parasites and *in vitro* axenic assays

*L. amazonensis* (MHOM/BR/LTB0016) were cultured at 25 °C in Schneider's Insect medium supplemented with 10 % (v/v) heat inactivated fetal bovine serum (iFBS), 100 U/mL penicillin, 100 µg/mL streptomycin, 5 mM HEPES pH 7.4 and 5 µg/mL phenol red. *L. infantum* promastigotes (MHOM/MA/67/ITMAP-263) were cultured at 25 °C in RPMI 1640 Glutamax medium supplemented with 10 % (v/v) iFBS, 50 U/mL penicillin, 50 µg/mL streptomycin and 20 mM HEPES sodium salt pH 7.4.

Promastigotes of *L. infantum* and *L. amazonensis* were seeded in 96-well plates at a density of  $3 \times 10^5$  cells/well in complete RPMI medium or complete Schneider's Insect medium, respectively, containing increasing concentrations of free-AmB and HA-AmB nanocomplexes (0.0029 - 0.75 µM). After an incubation period of 24 h at 26 °C, 20 µL of a filtered 2.5 mM resazurin solution prepared in PBS was added to each well, followed by a second incubation period of 24 h at 26 °C. Using a SpectraMAX GeminiXS microplate reader (Molecular Devices LLC, California, USA) the fluorescence intensity was measured ( $\lambda_{\text{ex}}$  560/ $\lambda_{\text{em}}$  590). The results were expressed as the mean percentage  $\pm$  SD of viable parasites relatively to control and the assay was performed in triplicate at least three times.

## Supplementary Data

### *In vitro* cytotoxicity assay

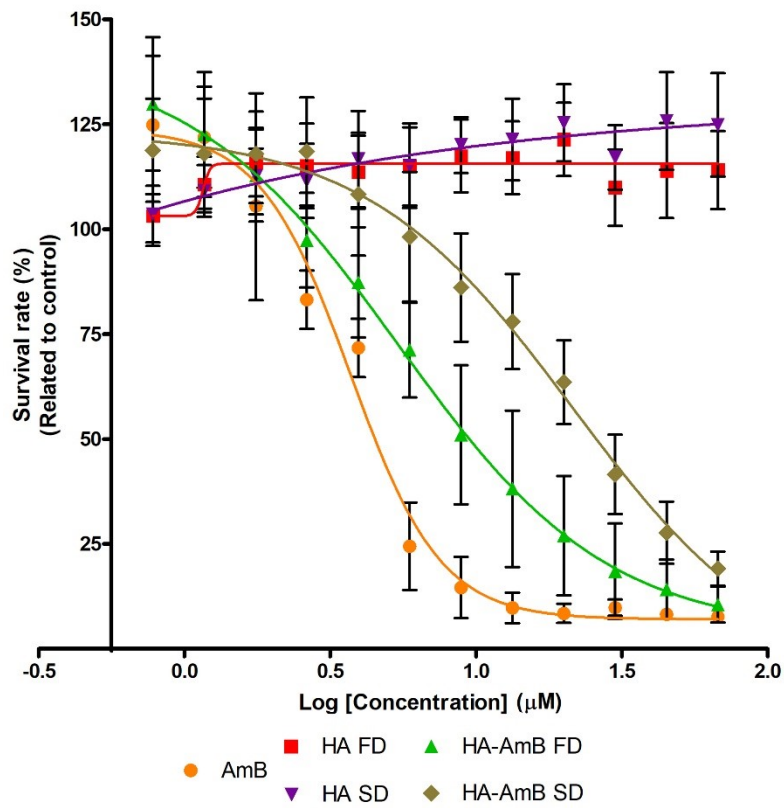

**Figure S 1** - Dose-response curves of the *in vitro* cytotoxic activity of free-AmB, AmBisome® and HA-AmB nanocomplexes against BMMΦ after 24 h of treatment.

## In vitro anti-leishmanial activity against promastigotes

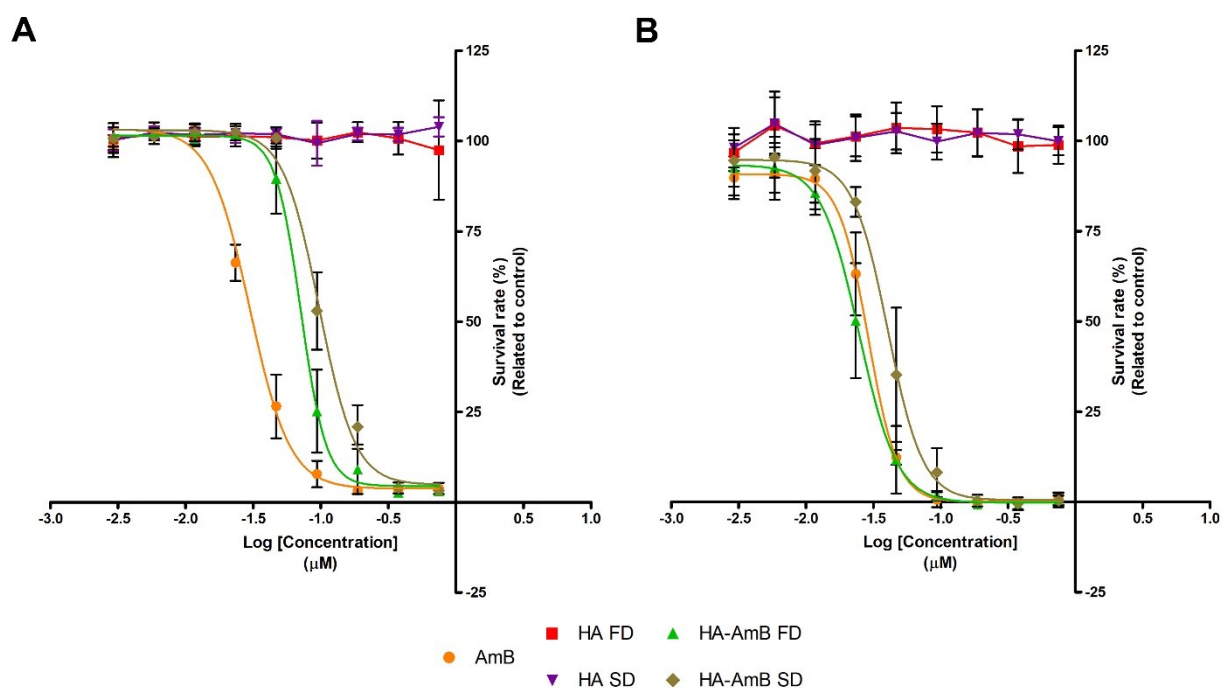

**Figure S 2** – Dose-response curves of the in vitro anti-leishmanial activity of free-AmB and HA-AmB nanocomplexes against **(A)** *L. amazonensis* and **(B)** *L. infantum* promastigote cultures after 24 h of treatment with different concentrations (0.0029 - 0.75  $\mu\text{M}$ ) of the above referred formulations. Data is expressed as mean  $\pm$  SD of at least three independent experiments.

**Table S 1** –  $\text{IC}_{50}$  values of the anti-leishmanial reference compound AmB and of HA-AmB nanocomplexes against promastigotes of *L. amazonensis*.

| Sample    | <i>L. amazonensis</i><br>promastigotes<br>$\text{IC}_{50}$ ( $\mu\text{M}$ ) |
|-----------|------------------------------------------------------------------------------|
| AmB       | $0.032 \pm 0.007$                                                            |
| HA-AmB FD | $0.072 \pm 0.037$                                                            |
| HA-AmB SD | $0.101 \pm 0.052$                                                            |

Means  $\pm$  SD (n = 3)

## *In vitro* anti-leishmanial activity against *L. infantum*-infected macrophages

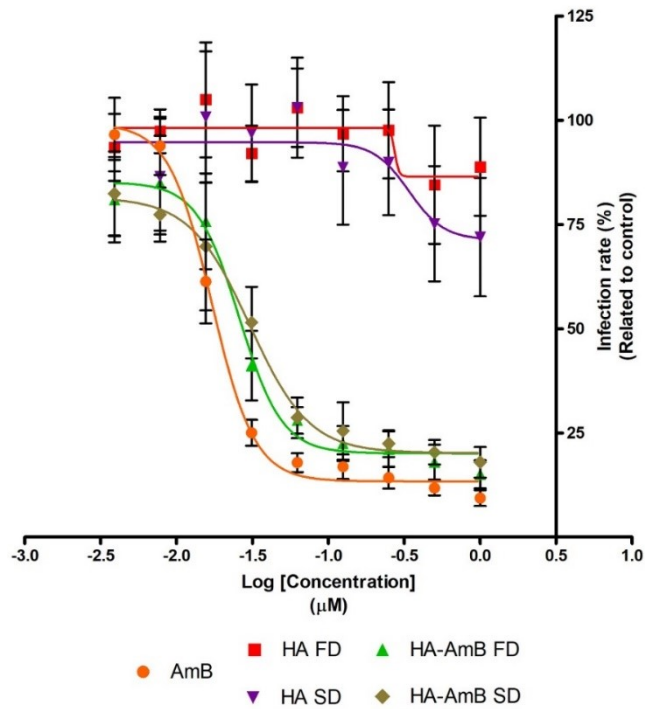

**Figure S 3** - *In vitro* effect of AmB and HA-AmB nanocomplexes on intracellular amastigotes. *L. infantum*-infected BMMΦ were treated for 24 h with different concentrations (0.0039 to 1 µM) of the above referred formulations. Data (mean ± SD of at least three independent experiments) was obtained employing an automated image analysis protocol available for the IN Cell Analyzer system and used for the obtention of the dose-response curves.

***In vivo* systemic toxicity assessment**

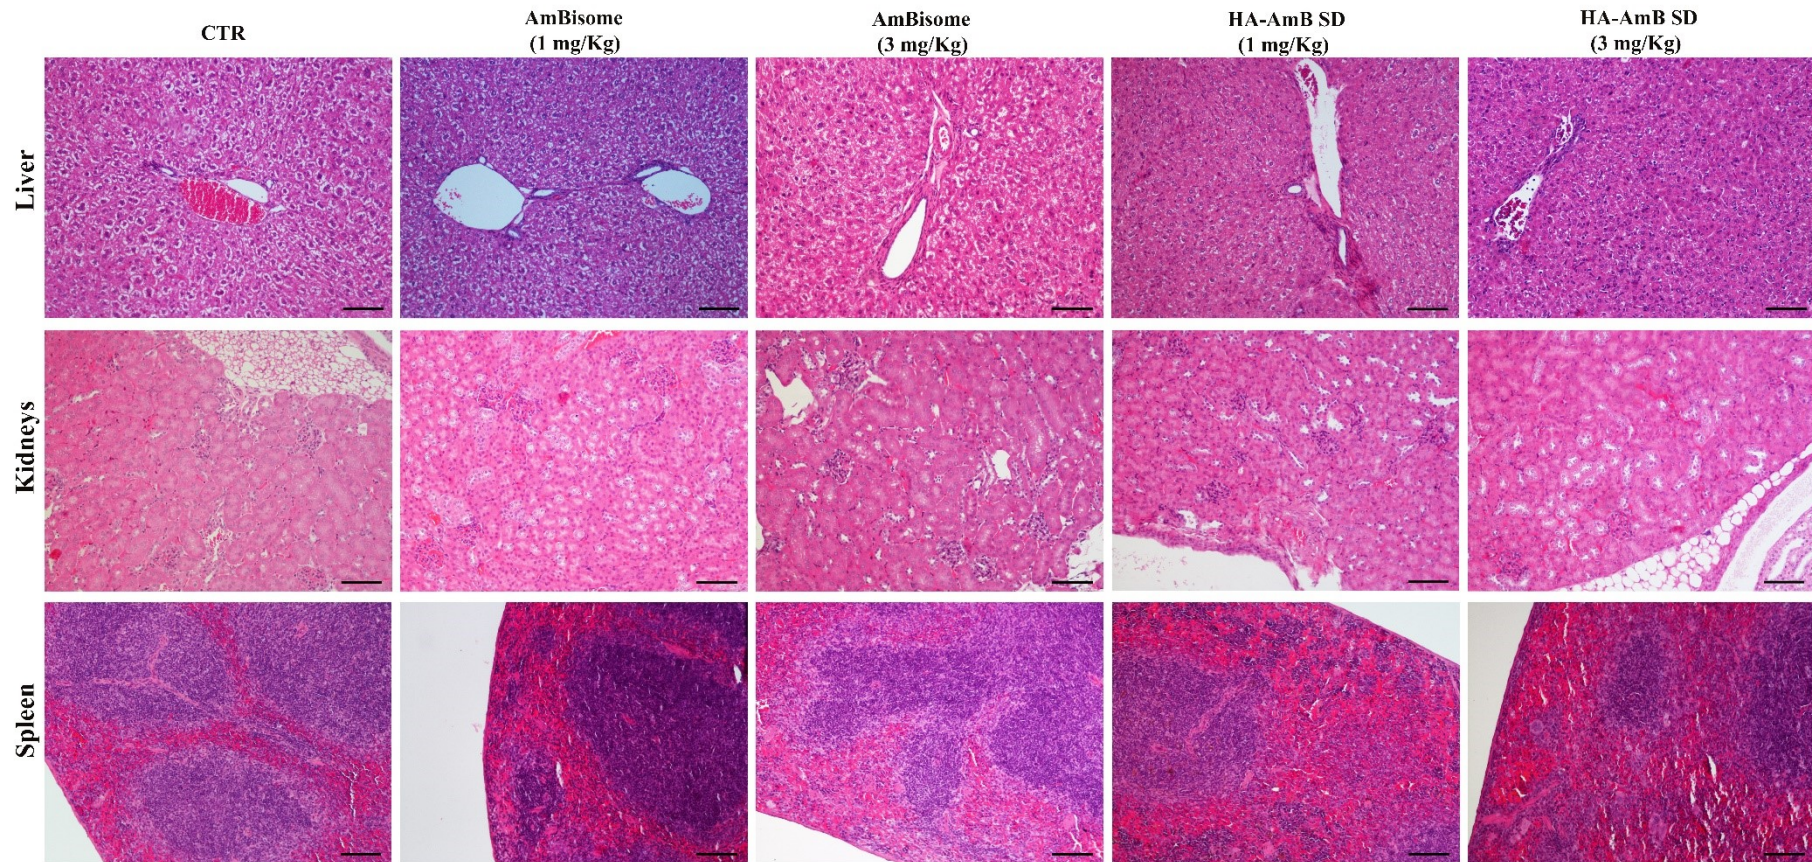

**Figure S 4** – Representative H&E stainings of the mice’s liver, kidney and spleen sections after treatment with AmBisome® (1 and 3 mg/Kg) and HA-AmB SD nanocomplex (1 and 3 mg/Kg) (100 x magnification, scale = 100  $\mu$ m).

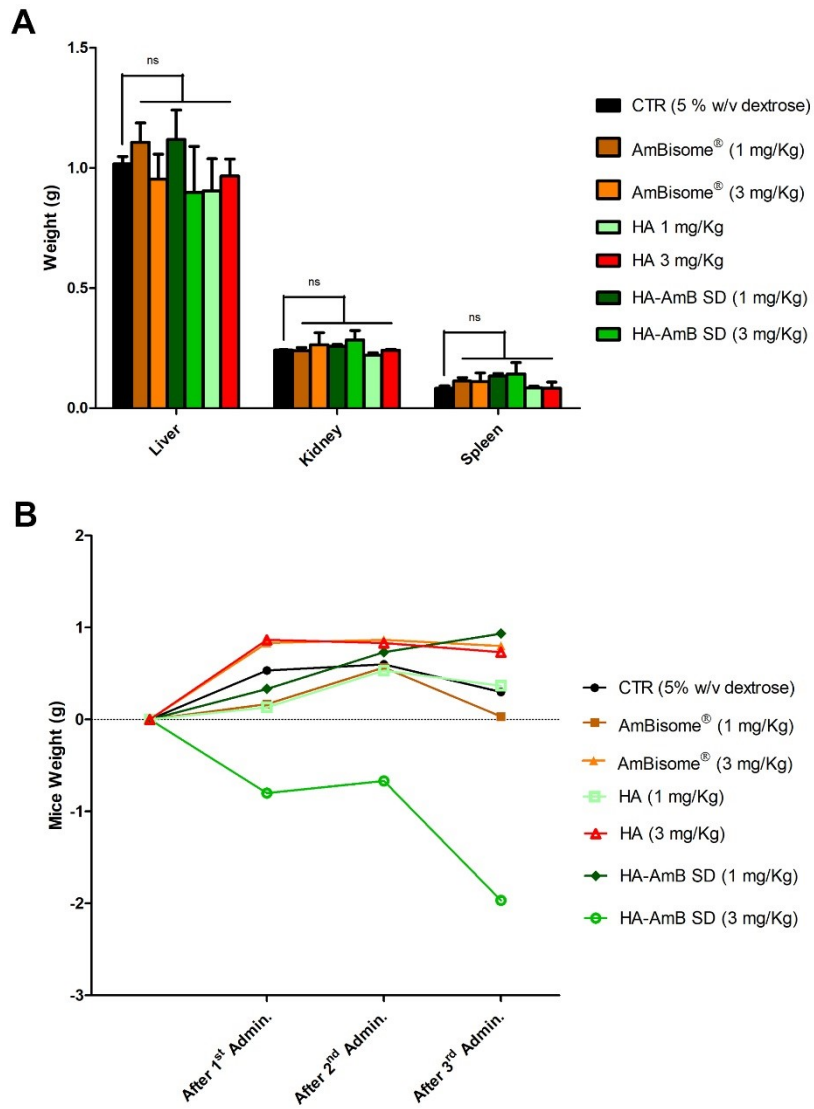

**Figure S 5** - Weight of the **(A)** collected organs and **(B)** mice after intravenous treatment with different formulations at 1 and 3 mg/Kg. Data is expressed as mean  $\pm$  SD. For the collected organs, bonferroni's multiple comparison post-test was used to evaluate differences between control and the treatment groups and no significant alterations were observed.

## In vivo anti-leishmanial activity in infected mice

Table S 2 – Body weight changes (mean  $\pm$  SD) according to each experimental group.

| Treatment groups       | Body weight (g)  |                   |               |
|------------------------|------------------|-------------------|---------------|
|                        | Before infection | Before euthanasia | Change (%)    |
| Non-infected           | 20.0 $\pm$ 1.2   | 21.0 $\pm$ 0.7    | 1.1 g (5.5 %) |
| CTR (5 % w/v dextrose) | 20.6 $\pm$ 1.8   | 21.4 $\pm$ 1.1    | 0.8 g (3.9 %) |
| AmBisome® (1 mg/Kg)    | 20.8 $\pm$ 1.6   | 22.0 $\pm$ 1.9    | 1.2 g (5.8 %) |
| HA-AmB SD (1 mg/Kg)    | 20.9 $\pm$ 1.2   | 21.9 $\pm$ 1.7    | 1.0 g (5.0 %) |

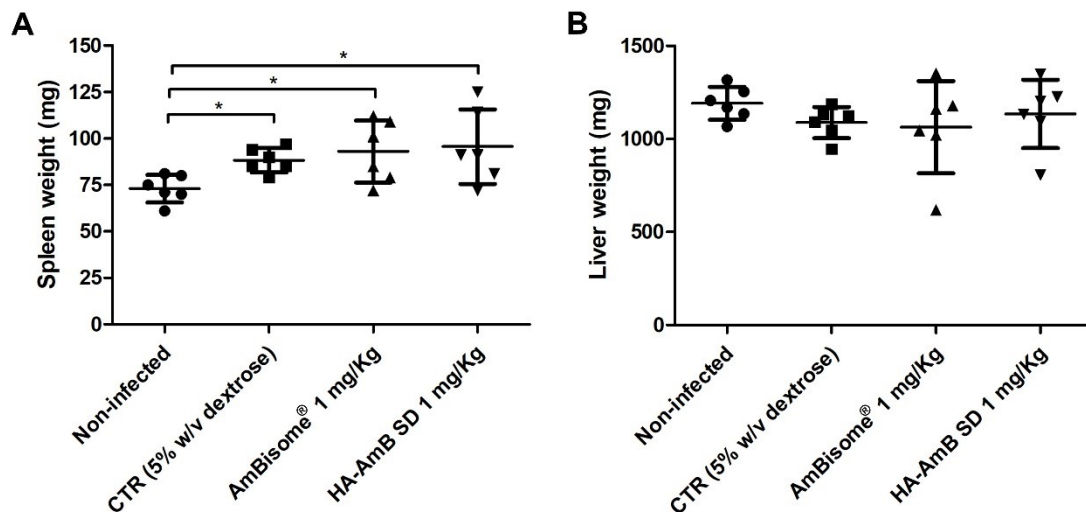

Figure S 6 - Weight of the (A) spleens and (B) livers collected from the treated mice. Each symbol represents one animal and the horizontal bars represent the mean weight of the organs. Bonferroni's multiple comparison post-test was used to evaluate differences between each group and only in the spleen was observed significant differences between the non-infected groups and the infected/treated groups ( $*p < 0.05$ ).



**Table S 3** - Histological alterations observed after intravenous treatment of *L. infantum*-infected mice with 1 mg/Kg of HA-AmB SD nanocomplex and AmBisome®.

| Organ  | Histological findings   | Treatments                            |                                                    |                                                    |                                         |
|--------|-------------------------|---------------------------------------|----------------------------------------------------|----------------------------------------------------|-----------------------------------------|
|        |                         | CTR<br>(5 % w/v<br>dextrose)          | Infected<br>CTR<br>(5 % w/v<br>dextrose)           | AmBisome                                           | HA-AmB<br>SD                            |
|        |                         |                                       |                                                    | 1 mg/Kg                                            | 1 mg/Kg                                 |
| Liver  | Inflammatory infiltrate | Slight periportal (lymphoid)<br>(1/3) | Slight multifocal (lymphoid)<br>(1/4)              | Slight multifocal (lymphoid)<br>(1/3)              | Slight multifocal and subacute<br>(3/3) |
|        | Lymphoid agglomerates   | -                                     | Multifocal to perivascular and periportal<br>(2/4) | Multifocal to perivascular and periportal<br>(2/3) | -                                       |
|        | Congestion              | Generalized<br>(1/3)                  | Generalized<br>(1/4)                               | Generalized<br>(1/3)                               | Generalized<br>(1/3)                    |
|        | Hydropic degeneration   | Generalized<br>(2/3)                  | Generalized<br>(1/4)                               | -                                                  | -                                       |
|        | Vascular ectasia        | Presence<br>(1/3)                     | Presence<br>(2/4)                                  | Presence<br>(2/3)                                  | Presence<br>(3/3)                       |
| Spleen | Follicular hyperplasia  | -                                     | Slight<br>(2/4)                                    | -                                                  | Slight<br>(2/3)                         |
|        | Hemosiderosis           | Diffuse presence<br>(1/3)             | -                                                  | -                                                  | -                                       |
